# Supplementary material for: Data-driven normalization strategies for high-throughput quantitative RT-PCR
Source: Springer Nature journal article supplement (doi:10.1186/1471-2105-10-110), 2009-04-19
Supplement: 12859_2008_2840_MOESM5_ESM.pdf [file 12859_2008_2840_MOESM5_ESM.pdf]

Y = log variance ratio

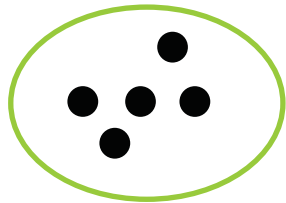

The  $Q_1$  normalized profiles are **more variable** than the  $Q_2$  normalized profiles for these **highly expressed** genes.

The  $Q_1$  and  $Q_2$  normalized profiles have the same variation.

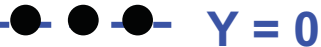

The  $Q_1$  normalized profiles are **less variable** than the  $Q_2$  normalized profiles for these **low expressed** genes.

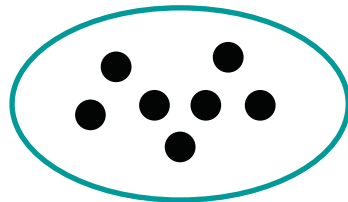

mean Ct value
