# Supplementary material for: Data-driven normalization strategies for high-throughput quantitative RT-PCR
Source: Springer Nature journal article supplement (doi:10.1186/1471-2105-10-110), 2009-04-19

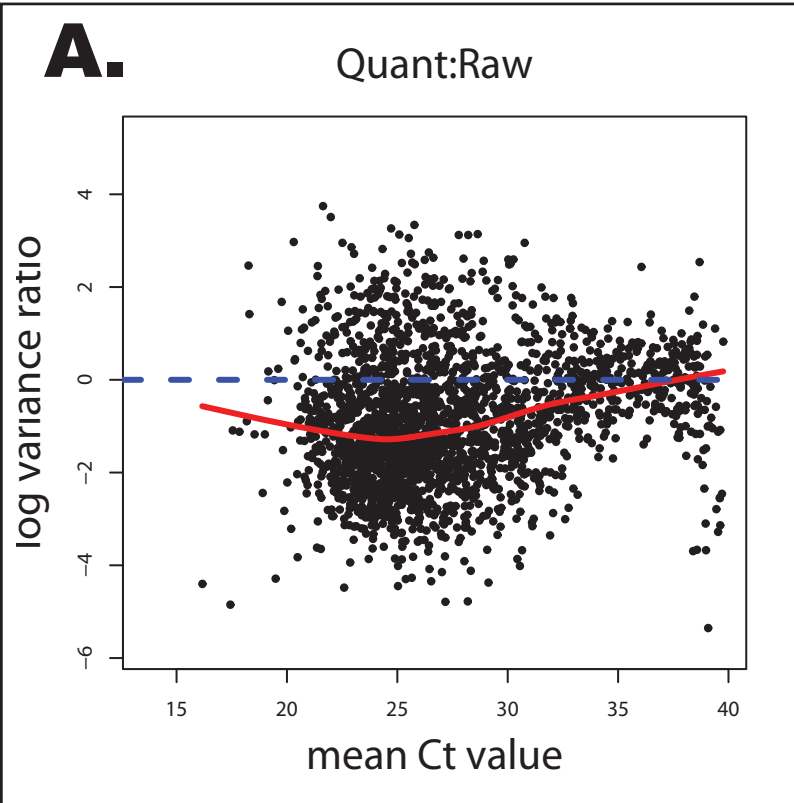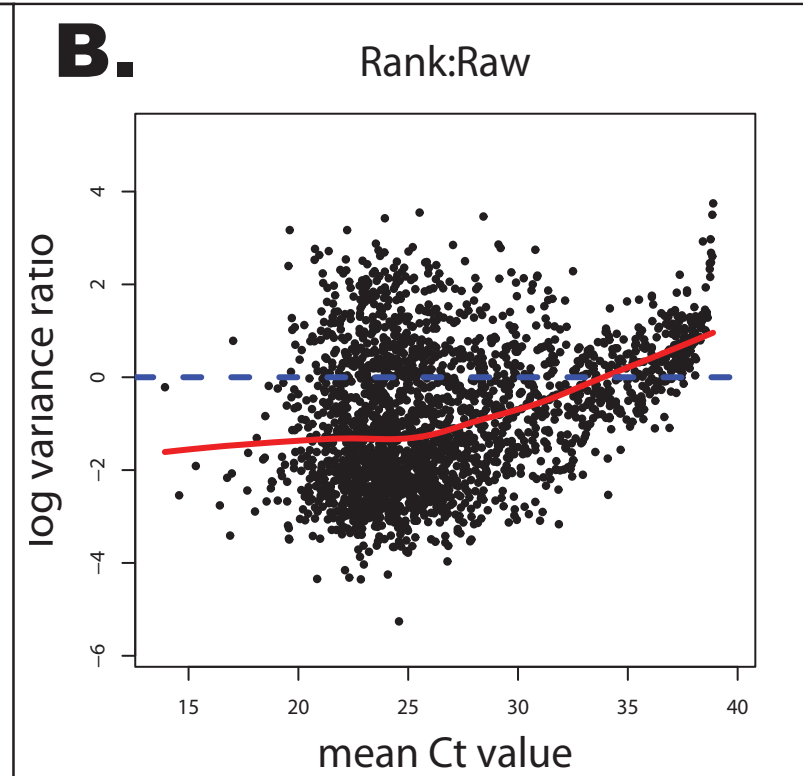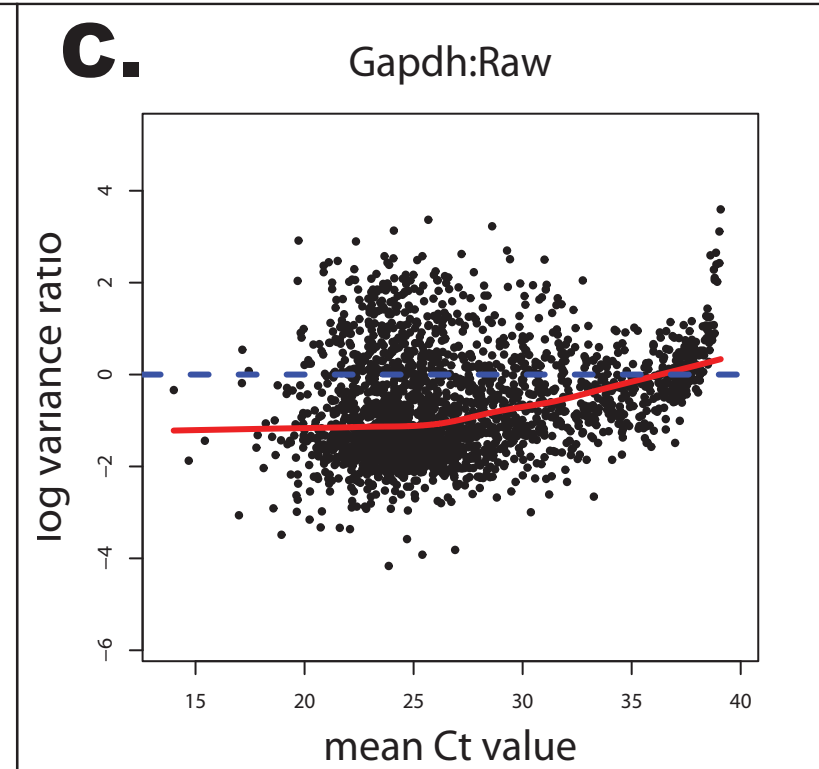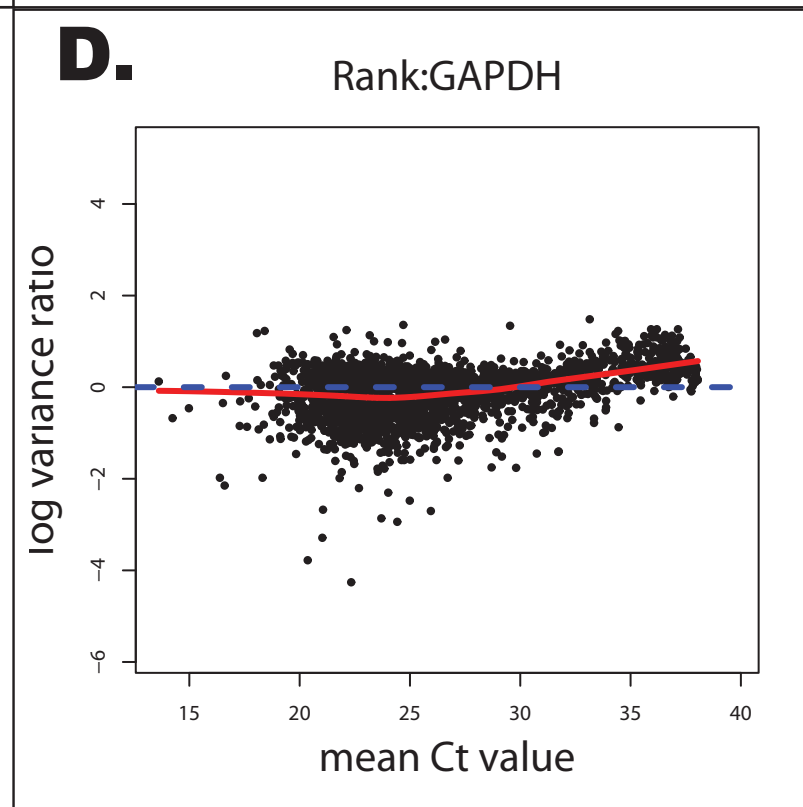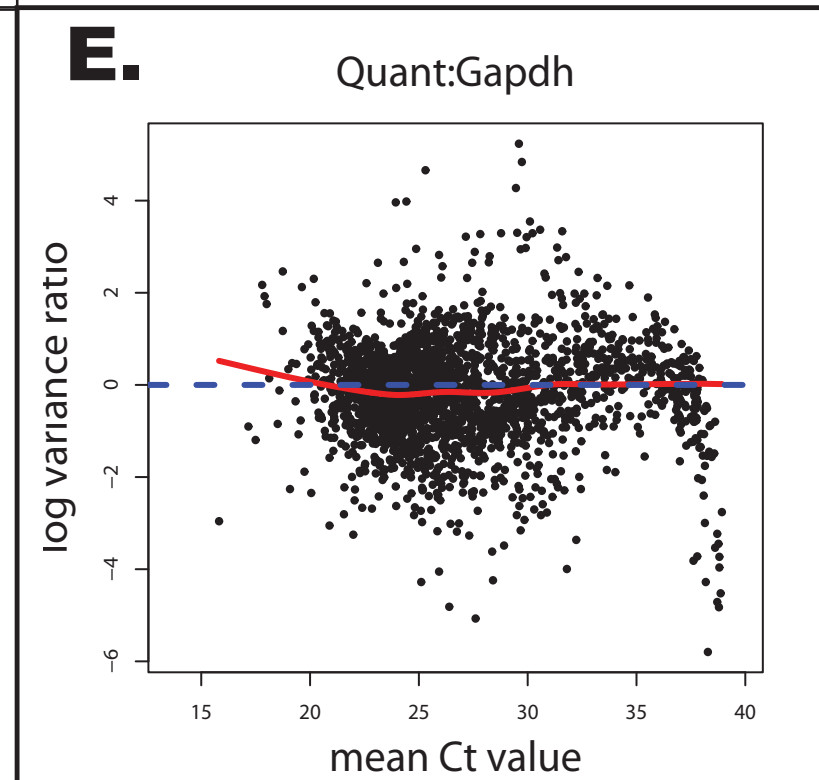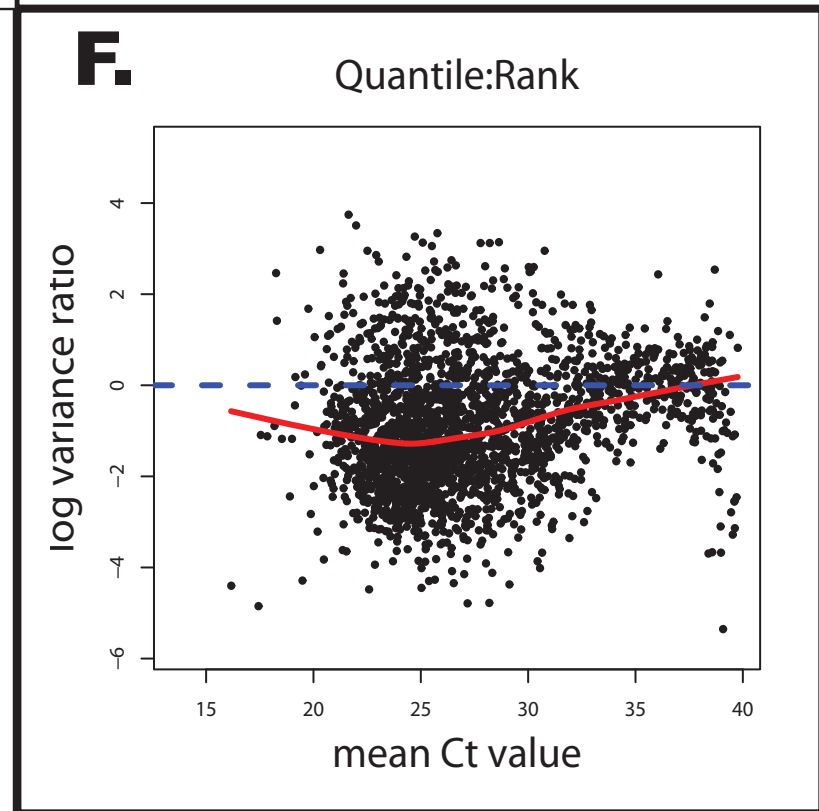

Supplement: 12859_2008_2840_MOESM6_ESM.pdf [file 12859_2008_2840_MOESM6_ESM.pdf]
